# Supplementary material for: Decreased spin-resolved anti-bonding states filling to accelerate CHO conversion into CH2O in transitional metal-doped Mo2C monolayers during CO2 reduction
Source: Royal Society of Chemistry journal article supplement (doi:10.1039/d2ta09959d), 2023-01-01
Supplement: d2ta09959d1.pdf [file d2ta09959d1.pdf]

## Supporting Information

# **Decreased Spin-resolved Anti-bonding States Filling to Accelerate CHO Conversion to CH<sub>2</sub>O in Transitional Metals Doped Mo<sub>2</sub>C Monolayer during CO<sub>2</sub> Reduction**

Liu Guo<sup>1</sup>, Rui Li<sup>1</sup>, Jiawei Jiang<sup>1</sup>, Xueping Fan<sup>1</sup>, Ji-Jun Zou<sup>2</sup>, Wenbo Mi<sup>1,\*</sup>

<sup>1</sup> *Tianjin Key Laboratory of Low Dimensional Materials Physics and Preparation Technology,*

*School of Science, Tianjin University, Tianjin 300354, China*

<sup>2</sup> *Key Laboratory for Green Chemical Technology of the Ministry of Education, School of Chemical*

*Engineering and Technology, Tianjin University, Tianjin 300072, China*

---

\*Author to whom all correspondence should be addressed.

E-mail: [miwenbo@tju.edu.cn](mailto:miwenbo@tju.edu.cn)

**Table S1** The total energy ( $E_{DFT}$ , eV), zero-point energy ( $E_{ZPE}$ , eV) and entropy ( $TS$ , eV) of CO<sub>2</sub>, H<sub>2</sub> and CO<sub>2</sub>.

| Species          | $E_{DFT}$ (eV) | $E_{ZPE}$ (eV) | $TS$ (eV) |
|------------------|----------------|----------------|-----------|
| CO <sub>2</sub>  | -23.02         | 0.31           | 0.65      |
| H <sub>2</sub>   | -6.78          | 0.27           | 0.42      |
| H <sub>2</sub> O | -14.23         | 0.58           | 0.65      |

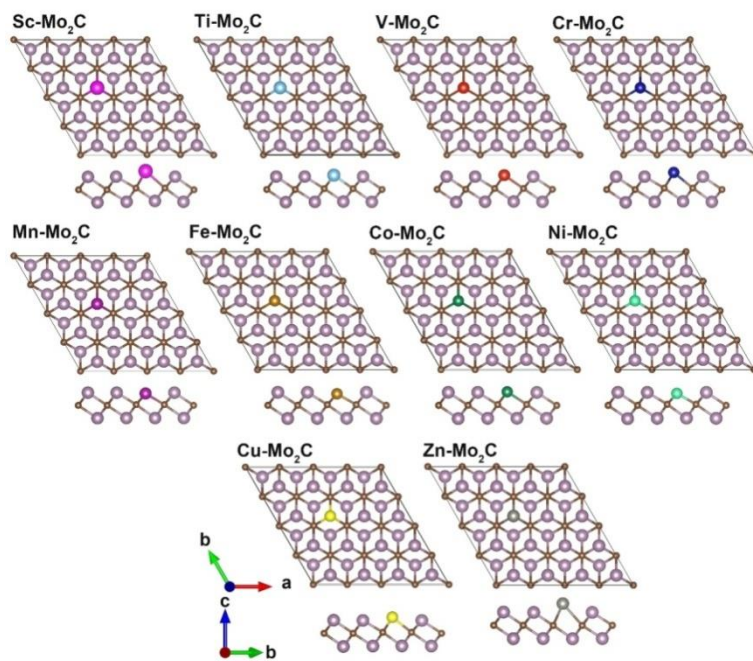

**Fig. S1.** Top and side views for optimized structures of TM-doped  $\text{Mo}_2\text{C}$  (TM=Tc, Ti, V, Cr, Mn, Fe, Co, Ni, Cu and Zn).

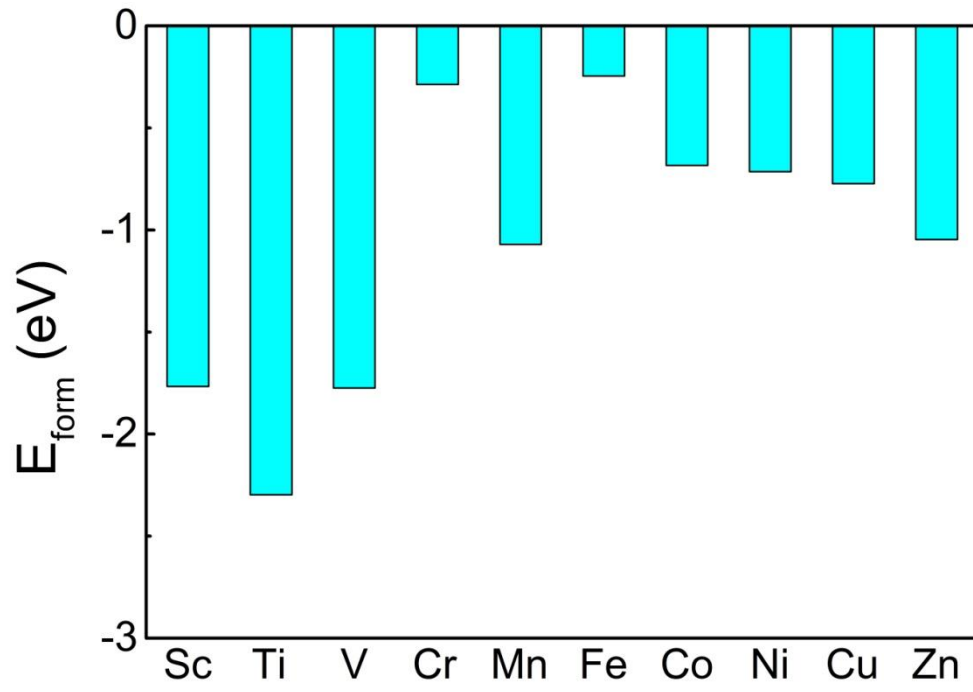

**Fig. S2.** The formation energies of TM-doped  $\text{Mo}_2\text{C}$  (TM=Tc, Ti, V, Cr, Mn, Fe, Co, Ni, Cu and Zn).

**Table S2** The lattice parameters ( $a=b$ ), bond length of Mo-C/TM-C ( $d_{\text{Mo-C}}/d_{\text{TM-C}}$ ) and the magnetic moments of TM and TM-Mo<sub>2</sub>C (TM=Tc, Ti, V, Cr, Mn, Fe, Co, Ni, Cu and Zn).

| TM-Mo <sub>2</sub> C                 | Sc    | Ti     | V     | Cr     | Mn     |
|--------------------------------------|-------|--------|-------|--------|--------|
| $a=b$ (Å)                            | 12.12 | 12.10  | 12.10 | 12.10  | 12.07  |
| $d_{\text{Mo-C}}$ (Å)                | 2.09  | 2.09   | 2.09  | 2.09   | 2.10   |
| $d_{\text{TM-C}}$ (Å)                | 2.34  | 2.13   | 2.13  | 2.24   | 1.97   |
| TM ( $\mu_{\text{B}}$ )              | 0     | -0.061 | 1.992 | -0.247 | -0.102 |
| Magnetic moment ( $\mu_{\text{B}}$ ) | 2.88  | 2.40   | 5.54  | 3.73   | 4.34   |
| TM-Mo <sub>2</sub> C                 | Fe    | Co     | Ni    | Cu     | Zn     |
| $a=b$ (Å)                            | 12.07 | 12.07  | 12.07 | 12.07  | 12.04  |
| $d_{\text{Mo-C1}}$ (Å)               | 2.09  | 2.10   | 2.10  | 2.09   | 2.07   |
| $d_{\text{TM-C1}}$ (Å)               | 1.96  | 2.05   | 1.96  | 2.17   | 2.57   |
| TM                                   | -0.57 | 1.91   | 0.02  | -0.004 | -0.001 |
| Magnetic moment ( $\mu_{\text{B}}$ ) | 2.83  | 4.55   | 2.69  | 1.97   | 1.82   |

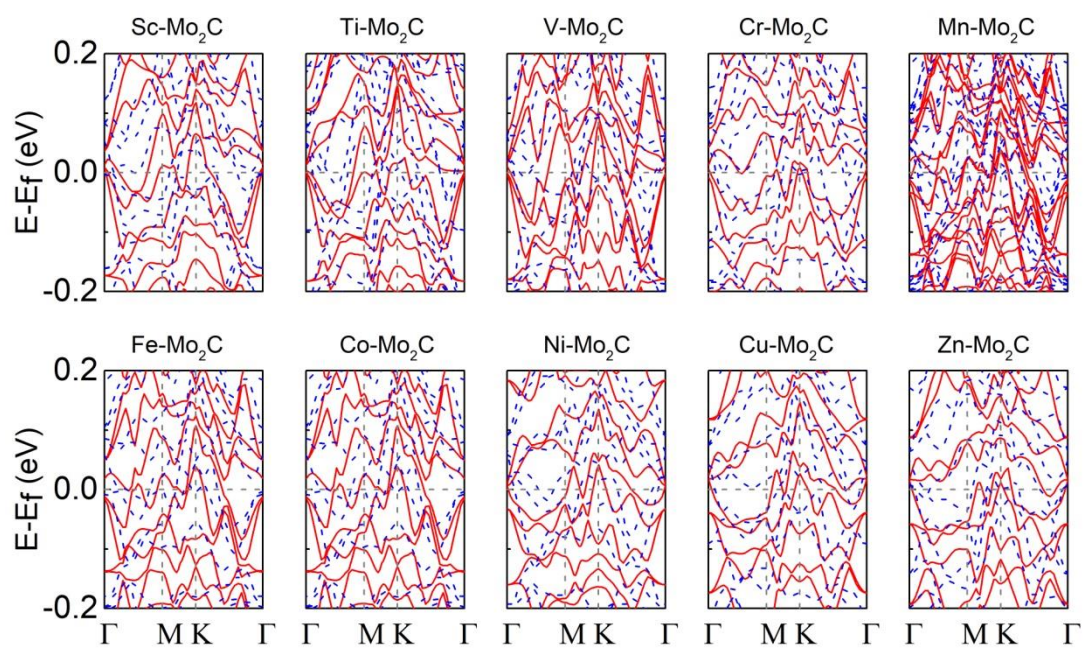

**Fig. S3.** The band st the energy of isolated TM atom (TM=Tc, Ti, V, Cr, Mn, Fe, Co, Ni, Cu and Zn).

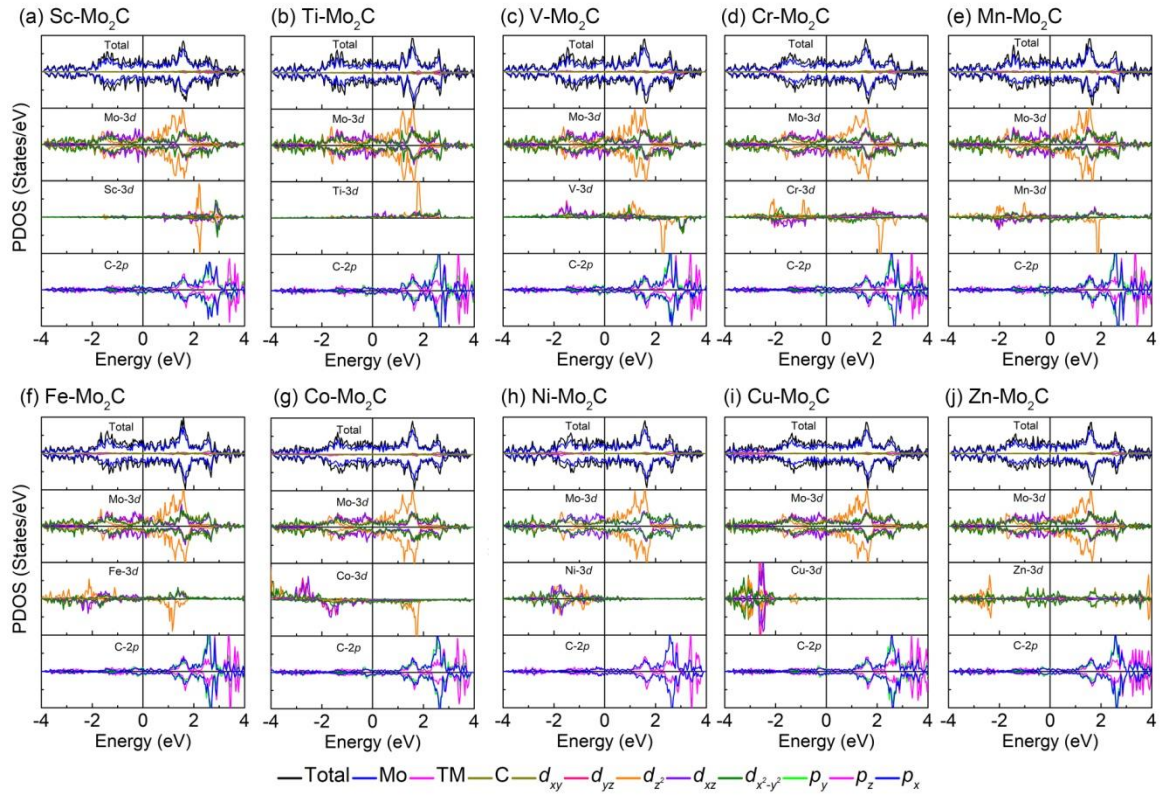

**Fig. S4.** The partial density of states of TM-doped  $\text{Mo}_2\text{C}$  (TM=Tc, Ti, V, Cr, Mn, Fe, Co, Ni, Cu and Zn).

**Table S3** The total energies of \*H-Mo<sub>2</sub>C, \*OH-Mo<sub>2</sub>C, \*H<sub>2</sub>O-Mo<sub>2</sub>C and \*CO<sub>2</sub>-Mo<sub>2</sub>C  $E_{\text{total}}$  (eV), the adsorption energies of H, OH, H<sub>2</sub>O and CO<sub>2</sub>  $E_{\text{ads}}$  (eV) and the gibbs free energies of \*H, \*OH, \*H<sub>2</sub>O and CO<sub>2</sub>  $\Delta G$  (eV)

|                                     | $E_{\text{total}}$ | $E_{\text{ads}}$ | $\Delta G$ |
|-------------------------------------|--------------------|------------------|------------|
| *H-Mo <sub>2</sub> C                | -371.19            | -1.75            | -1.79      |
| *OH-Mo <sub>2</sub> C               | -379.01            | -2.12            | -1.72      |
| *H <sub>2</sub> O-Mo <sub>2</sub> C | -381.94            | -1.66            | -1.21      |
| *CO <sub>2</sub> -Mo <sub>2</sub> C | -391.14            | 0.43             | 0.90       |



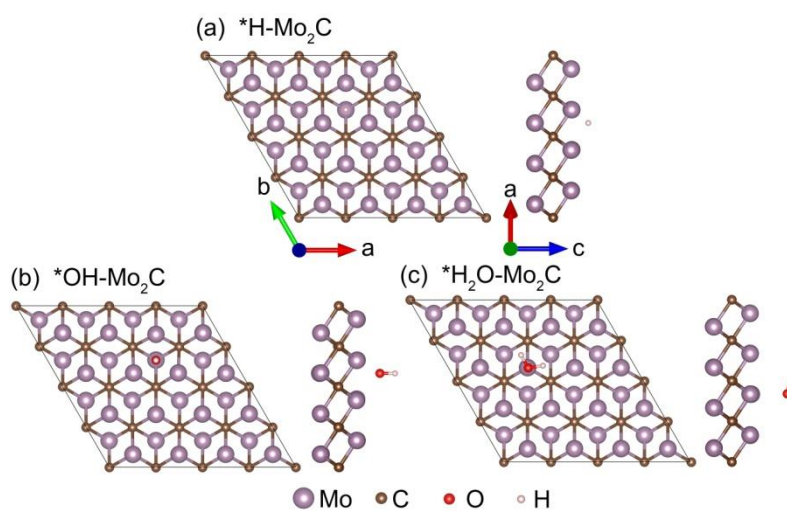

**Fig. S5.** Top and side views of optimized structure for (a) H, (b) OH and (c) H<sub>2</sub>O adsorbed on the bridge sites of pure Mo<sub>2</sub>C.

**Table S4** The charge transfer of each element for pure Mo<sub>2</sub>C and TM-Mo<sub>2</sub>C (TM= Cr, Mn, Fe, Co, Ni, and Cu)with CO<sub>2</sub> adsorbed over the bridge active sites.

| Charge Transfer | Mo <sub>2</sub> C | Cr-Mo <sub>2</sub> C | Mn-Mo <sub>2</sub> C | Fe-Mo <sub>2</sub> C | Co-Mo <sub>2</sub> C | Ni-Mo <sub>2</sub> C | Cu-Mo <sub>2</sub> C |
|-----------------|-------------------|----------------------|----------------------|----------------------|----------------------|----------------------|----------------------|
| Mo              | 0.72              | -1.08                | -1.09                | -1.12                | -1.12                | -1.14                | -1.13                |
| TM              | -0.75             | -1.03                | -1.02                | -0.41                | -0.39                | -0.27                | -0.22                |
| C               | -1.21             | -1.22                | -1.24                | -1.12                | -1.12                | -1.14                | -1.23                |
| O1              | 1.08              | 1.12                 | 1.14                 | -1.23                | -1.22                | -1.08                | -1.22                |
| O2              | 1.08              | 1.06                 | 1.06                 | 1.09                 | 1.09                 | 1.08                 | 1.08                 |

**Table S5** The gibbs free energy ( $\Delta G$ , eV), adsorbed energy ( $\Delta E_{DFT}$ , eV), entropy ( $\Delta TS$ , eV) and zero-point energy ( $\Delta E_{ZPE}$ , eV) corrections in determining the free energy of intermediates adsorbed on pure  $\text{Mo}_2\text{C}$  and TM- $\text{Mo}_2\text{C}$  (TM= Cr, Mn, Fe, Co, Ni, and Cu).

|                           |                                      | Path way                               | $\Delta G$ | $\Delta E_{DFT}$ | $\Delta E_{ZPE}$ | $\Delta TS$ |
|---------------------------|--------------------------------------|----------------------------------------|------------|------------------|------------------|-------------|
| $\text{Mo}_2\text{C}$     | 1                                    | *H                                     | 0.90       | 0.43             | -0.01            | -0.48       |
|                           | 2                                    | *CO <sub>2</sub> →*COOH                | 0.19       | -0.16            | 0.16             | -0.19       |
|                           | 3                                    | *COOH→*CO                              | -0.45      | -0.07            | 0.02             | 0.40        |
|                           | 4                                    | *CO→*CHO                               | 0.16       | -0.23            | 0.15             | -0.25       |
|                           | 4                                    | *CO→*COH                               | 0.46       | 0.13             | 0.14             | -0.19       |
|                           | 5                                    | *CHO→*CHOH                             | 1.36       | 1.00             | 0.16             | -0.20       |
|                           |                                      | *CHO→*CH <sub>2</sub> O                | 3.00       | 2.86             | -0.02            | -0.16       |
|                           | 6                                    | *CHOH→*CH <sub>2</sub> OH              | -0.28      | -0.65            | 0.19             | -0.18       |
|                           |                                      | *CH <sub>2</sub> O→*CH <sub>2</sub> OH | -1.91      | -2.50            | 0.38             | -0.21       |
| 7                         | *CH <sub>2</sub> OH→*CH <sub>2</sub> | -4.48                                  | -4.08      | -0.05            | 0.35             |             |
| 8                         | *CH <sub>2</sub> →*CH <sub>3</sub>   | -0.17                                  | -0.51      | 0.15             | -0.19            |             |
| 9                         | *CH <sub>3</sub> →*CH <sub>4</sub>   | 0.51                                   | 0.27       | 0.20             | -0.04            |             |
| <hr/>                     |                                      |                                        |            |                  |                  |             |
|                           |                                      | Path way                               | $\Delta G$ | $\Delta E_{DFT}$ | $\Delta E_{ZPE}$ | $\Delta TS$ |
| Fe- $\text{Mo}_2\text{C}$ | 1                                    | *CO <sub>2</sub>                       | -0.86      | -1.35            | 0.00             | -0.49       |
|                           | 2                                    | *CO <sub>2</sub> →*COOH                | 0.66       | 0.32             | 0.17             | -0.17       |
|                           | 3                                    | *COOH→*CO                              | -0.77      | -0.44            | 0.03             | 0.36        |
|                           | 4                                    | *CO→*CHO                               | 0.41       | 0.09             | 0.09             | -0.23       |
|                           | 5                                    | *CHO→*CHOH                             | 0.43       | 0.05             | 0.19             | -0.19       |
|                           |                                      | *CHO→*CH <sub>2</sub> O                | -1.40      | -1.76            | 0.17             | -0.19       |
|                           | 6                                    | *CHOH→*CH <sub>2</sub> OH              | -0.15      | -0.51            | 0.17             | -0.19       |
|                           |                                      | *CH <sub>2</sub> O→*CH <sub>2</sub> OH | 1.68       | 1.30             | 0.19             | -0.18       |
|                           | 7                                    | *CH <sub>2</sub> OH→*CH <sub>2</sub>   | -0.72      | -0.33            | -0.02            | 0.37        |
| 8                         | *CH <sub>2</sub> →*CH <sub>3</sub>   | -0.19                                  | -0.56      | 0.17             | -0.20            |             |
| 9                         | *CH <sub>3</sub> →*CH <sub>4</sub>   | 0.58                                   | 0.32       | 0.18             | -0.08            |             |

|                      |                                    | Path way                               | $\Delta G$ | $\Delta E_{DFT}$ | $\Delta E_{ZPE}$ | $\Delta TS$ |
|----------------------|------------------------------------|----------------------------------------|------------|------------------|------------------|-------------|
| Co-Mo <sub>2</sub> C | 1                                  | *CO <sub>2</sub>                       | -0.91      | -1.39            | 0.00             | -0.48       |
|                      | 2                                  | *CO <sub>2</sub> →*COOH                | 0.58       | 0.23             | 0.17             | -0.18       |
|                      | 3                                  | *COOH→*CO                              | -0.56      | -0.24            | 0.03             | 0.35        |
|                      | 4                                  | *CO→*CHO                               | 0.36       | 0.14             | 0.06             | -0.16       |
|                      | 5                                  | *CHO→*CHOH                             | 0.85       | 0.44             | 0.19             | -0.21       |
|                      |                                    | *CHO→*CH <sub>2</sub> O                | -0.33      | -0.78            | 0.20             | -0.25       |
|                      | 6                                  | *CHOH→*CH <sub>2</sub> OH              | -0.60      | -0.98            | 0.18             | -0.20       |
|                      |                                    | *CH <sub>2</sub> O→*CH <sub>2</sub> OH | 0.57       | 0.24             | 0.17             | -0.16       |
|                      | 7                                  | *CH <sub>2</sub> OH→*CH <sub>2</sub>   | -0.64      | -0.30            | -0.01            | 0.33        |
| 8                    | *CH <sub>2</sub> →*CH <sub>3</sub> | -0.31                                  | -0.68      | 0.18             | -0.19            |             |
| 9                    | *CH <sub>3</sub> →*CH <sub>4</sub> | 0.50                                   | 0.34       | 0.19             | 0.03             |             |

|                      |                                    | Path way                               | $\Delta G$ | $\Delta E_{DFT}$ | $\Delta E_{ZPE}$ | $\Delta TS$ |
|----------------------|------------------------------------|----------------------------------------|------------|------------------|------------------|-------------|
| Cu-Mo <sub>2</sub> C | 1                                  | *CO <sub>2</sub>                       | -0.87      | -1.36            | 0.00             | -0.49       |
|                      | 2                                  | *CO <sub>2</sub> →*COOH                | 0.57       | 0.25             | 0.16             | -0.16       |
|                      | 3                                  | *COOH→*CO                              | -0.54      | -0.23            | 0.03             | 0.34        |
|                      | 4                                  | *CO→*CHO                               | 0.36       | 0.13             | 0.06             | -0.17       |
|                      | 5                                  | *CHO→*CHOH                             | 1.10       | 0.76             | 0.17             | -0.17       |
|                      |                                    | *CHO→*CH <sub>2</sub> O                | 0.02       | -0.43            | 0.22             | -0.23       |
|                      | 6                                  | *CHOH→*CH <sub>2</sub> OH              | -0.38      | -0.84            | 0.22             | -0.24       |
|                      |                                    | *CH <sub>2</sub> O→*CH <sub>2</sub> OH | 0.69       | 0.35             | 0.17             | -0.17       |
|                      | 7                                  | *CH <sub>2</sub> OH→*CH <sub>2</sub>   | -0.74      | -0.39            | -0.01            | 0.34        |
| 8                    | *CH <sub>2</sub> →*CH <sub>3</sub> | -0.14                                  | -0.47      | 0.16             | -0.17            |             |
| 9                    | *CH <sub>3</sub> →*CH <sub>4</sub> | -0.07                                  | -0.29      | 0.18             | -0.04            |             |

|                      |   | Path way                | $\Delta G$ | $\Delta E_{DFT}$ | $\Delta E_{ZPE}$ | $\Delta TS$ |
|----------------------|---|-------------------------|------------|------------------|------------------|-------------|
| Cr-Mo <sub>2</sub> C | 1 | *CO <sub>2</sub>        | -0.73      | -1.20            | -0.01            | -0.48       |
|                      | 2 | *CO <sub>2</sub> →*COOH | -1.40      | -1.81            | 0.19             | -0.22       |
|                      | 3 | *COOH→*CO               | -0.36      | 0.03             | 0.00             | 0.39        |
|                      | 4 | *CO→*CHO                | 0.38       | 0.04             | 0.14             | -0.20       |

|   |                                        |       |       |       |       |
|---|----------------------------------------|-------|-------|-------|-------|
| 5 | *CHO→*CHOH                             | 0.36  | -0.04 | 0.17  | -0.23 |
|   | *CHO→*CH <sub>2</sub> O                | -0.07 | -0.42 | 0.11  | -0.24 |
| 6 | *CHOH→*CH <sub>2</sub> OH              | -0.08 | -0.44 | 0.16  | -0.20 |
|   | *CH <sub>2</sub> O→*CH <sub>2</sub> OH | 0.34  | -0.06 | 0.22  | -0.18 |
| 7 | *CH <sub>2</sub> OH→*CH <sub>2</sub>   | -0.86 | -0.45 | -0.03 | 0.38  |
| 8 | *CH <sub>2</sub> →*CH <sub>3</sub>     | -0.07 | -0.43 | 0.17  | -0.19 |
| 9 | *CH <sub>3</sub> →*CH <sub>4</sub>     | 0.23  | -0.06 | 0.21  | -0.08 |

|                      |                                    | Path way                               | $\Delta G$ | $\Delta E_{DFT}$ | $\Delta E_{ZPE}$ | $\Delta TS$ |
|----------------------|------------------------------------|----------------------------------------|------------|------------------|------------------|-------------|
| Mn-Mo <sub>2</sub> C | 1                                  | *CO <sub>2</sub>                       | -2.50      | -2.95            | -0.01            | -0.46       |
|                      | 2                                  | *CO <sub>2</sub> →*COOH                | 0.65       | 0.30             | 0.18             | -0.17       |
|                      | 3                                  | *COOH→*CO                              | -1.29      | -1.05            | -0.54            | -0.30       |
|                      | 4                                  | *CO→*CHO                               | 0.23       | -0.05            | 0.07             | -0.21       |
|                      | 5                                  | *CHO→*CHOH                             | 0.58       | 0.22             | 0.17             | -0.19       |
|                      |                                    | *CHO→*CH <sub>2</sub> O                | 0.12       | -0.29            | 0.17             | -0.24       |
|                      | 6                                  | *CHOH→*CH <sub>2</sub> OH              | -0.01      | -0.47            | 0.22             | -0.24       |
|                      |                                    | *CH <sub>2</sub> O→*CH <sub>2</sub> OH | 0.45       | 0.05             | 0.22             | -0.18       |
|                      | 7                                  | *CH <sub>2</sub> OH→*CH <sub>2</sub>   | -0.46      | -0.04            | -0.04            | 0.38        |
| 8                    | *CH <sub>2</sub> →*CH <sub>3</sub> | -0.65                                  | -1.02      | 0.18             | -0.19            |             |
| 9                    | *CH <sub>3</sub> →*CH <sub>4</sub> | 0.67                                   | 0.38       | 0.20             | -0.09            |             |

|                      |   | Path way                               | $\Delta G$ | $\Delta E_{DFT}$ | $\Delta E_{ZPE}$ | $\Delta TS$ |
|----------------------|---|----------------------------------------|------------|------------------|------------------|-------------|
| Ni-Mo <sub>2</sub> C | 1 | *CO <sub>2</sub>                       | -0.67      | -1.13            | -0.03            | -0.49       |
|                      | 2 | *CO <sub>2</sub> →*COOH                | 0.53       | 0.15             | 0.17             | -0.21       |
|                      | 3 | *COOH→*CO                              | -0.60      | -0.44            | 0.24             | 0.40        |
|                      | 4 | *CO→*CHO                               | 0.17       | 0.11             | -0.13            | -0.19       |
|                      | 5 | *CHO→*CHOH                             | 0.435      | -0.005           | 0.21             | -0.23       |
|                      |   | *CHO→*CH <sub>2</sub> O                | -0.30      | -0.74            | 0.20             | -0.24       |
|                      | 6 | *CHOH→*CH <sub>2</sub> OH              | -0.23      | -0.58            | 0.17             | -0.18       |
|                      |   | *CH <sub>2</sub> O→*CH <sub>2</sub> OH | 0.51       | 0.15             | 0.18             | -0.18       |

|   |                                      |       |       |       |       |
|---|--------------------------------------|-------|-------|-------|-------|
| 7 | *CH <sub>2</sub> OH→*CH <sub>2</sub> | -0.25 | -0.25 | 0.44  | 0.44  |
| 8 | *CH <sub>2</sub> →*CH <sub>3</sub>   | -0.63 | -0.61 | -0.29 | -0.27 |
| 9 | *CH <sub>3</sub> →*CH <sub>4</sub>   | 0.61  | 0.35  | 0.18  | -0.08 |

---

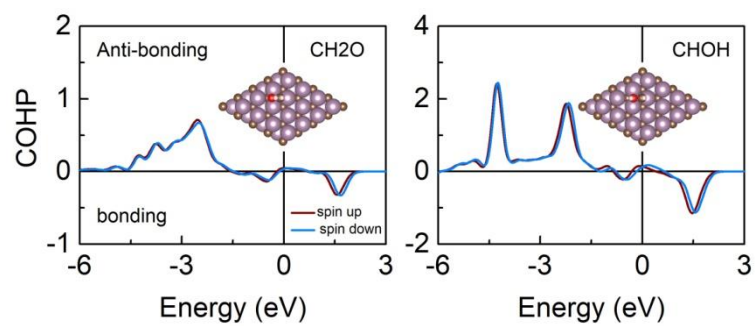

**Fig. S6.** The optimized structures and COHP of Mo<sub>2</sub>C with CH<sub>2</sub>O and CHO intermediates adsorbed on Mo atoms.
